# Supplementary material for: Effect of the relative permittivity of oxides on the performance of triboelectric nanogenerators
Source: Royal Society of Chemistry journal article supplement (doi:10.1039/c7ra07274k), 2017-01-01
Supplement: c7ra07274k1.pdf [file c7ra07274k1.pdf]

## Supplementary Information

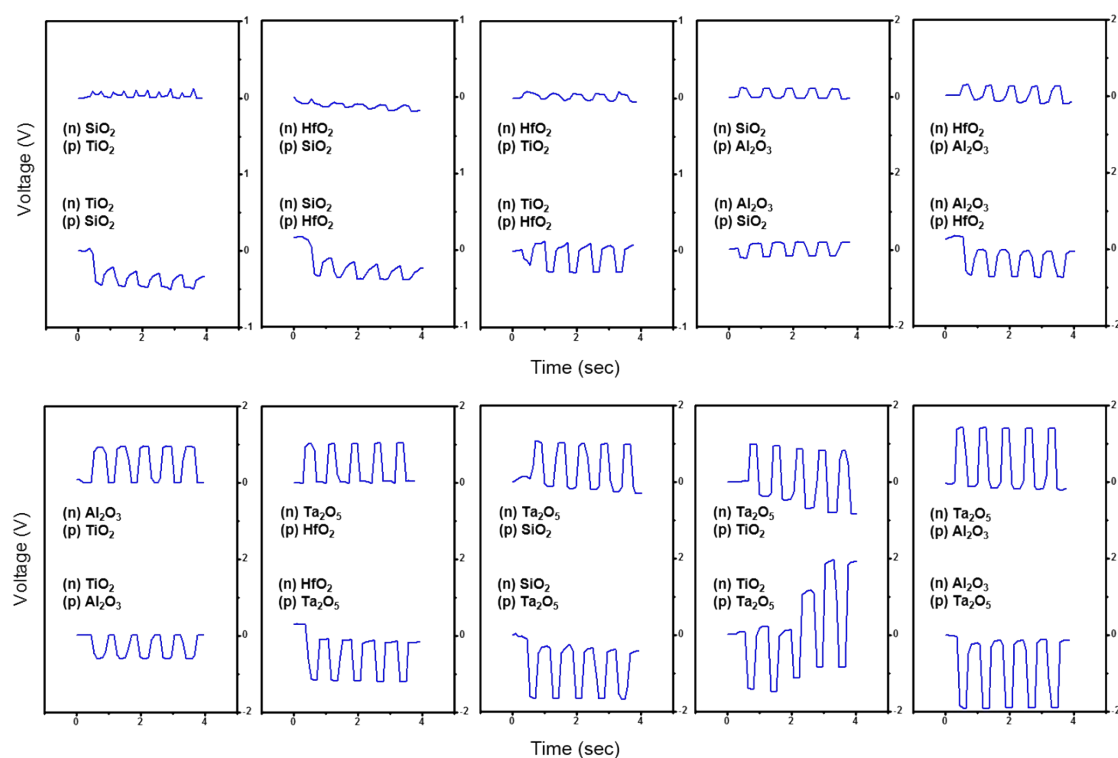

Fig. S1. The  $V_{oc}$  data measured in order to list triboelectric polarity of oxide dielectric materials in forward and reverse connection.

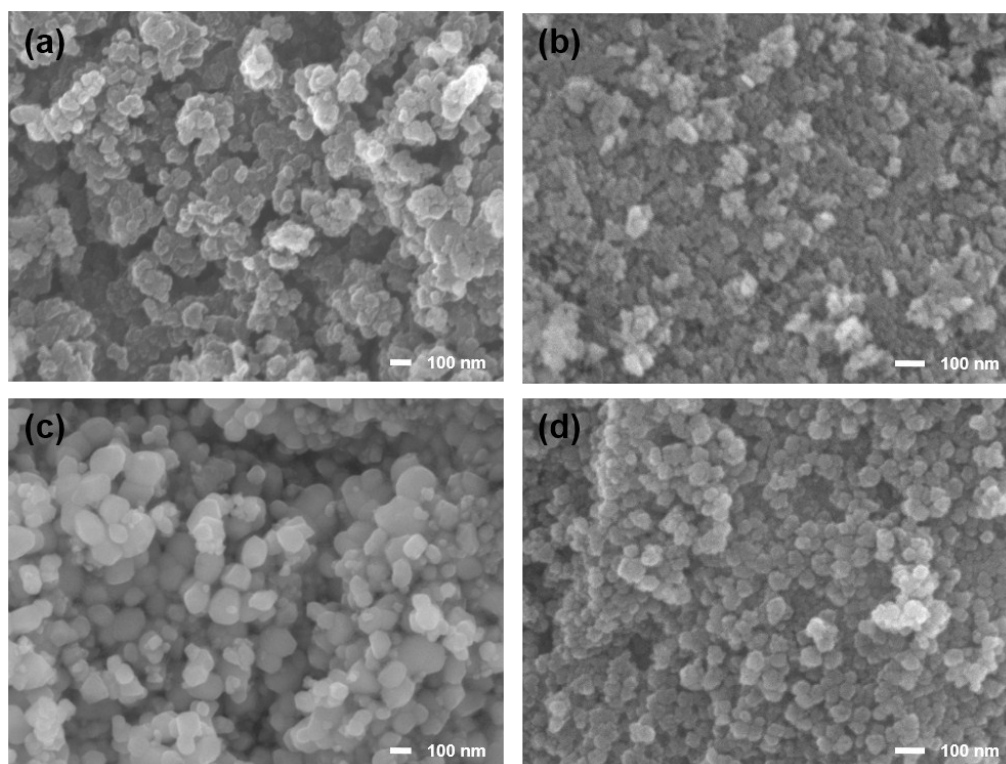

Fig. S2. SEM image of (a)  $\text{SiO}_2$ , (b)  $\text{Al}_2\text{O}_3$ , (c)  $\text{HfO}_2$ , and (d)  $\text{TiO}_2$  NPs.

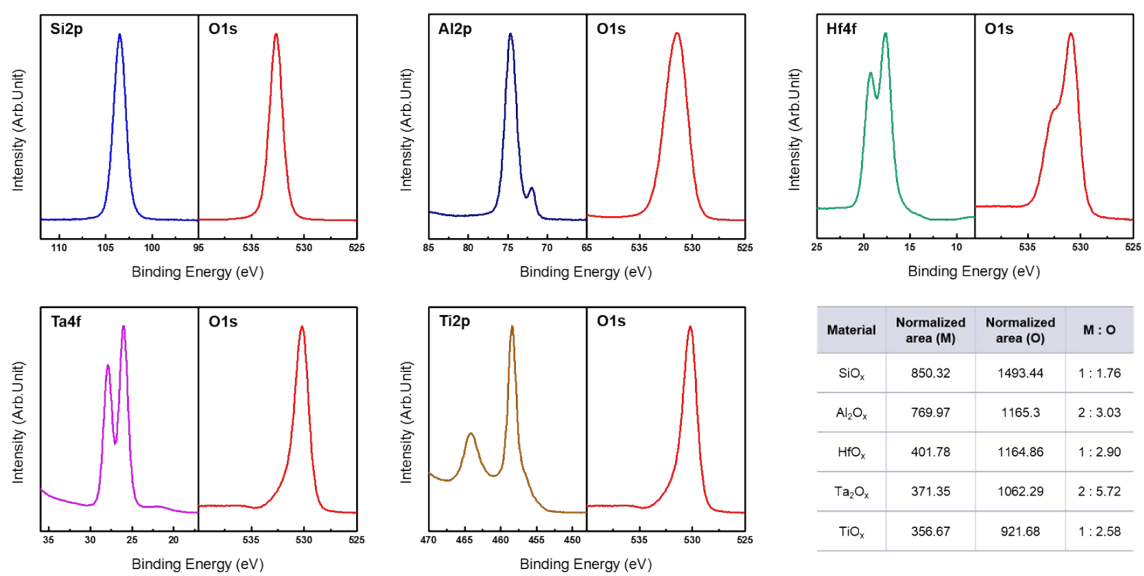

Fig. S3. XPS spectra of  $\text{SiO}_2$ ,  $\text{Al}_2\text{O}_3$ ,  $\text{HfO}_2$ ,  $\text{Ta}_2\text{O}_5$  and  $\text{TiO}_2$ , and a table of information from the XPS data.
